# Supplementary material for: Pharmaceutical Compounds in Aquatic Environments—Occurrence, Fate and Bioremediation Prospective
Source: MDPI journal article supplement (doi:10.3390/toxics9100257), 2021-10-09
Supplement: s1 [file s1]

# Supplementary Materials: Pharmaceutical Compounds in Aquatic Environments—Occurrence, Fate and Bioremediation Prospective

Joana P. Fernandes, C. Marisa R. Almeida, Maria A. Salgado, Maria F. Carvalho and Ana P. Mucha

**Table S1.** Pharmaceutical's concentration detected in surface water samples (expressed in ng/L).

| Therapeutic Class | Pharmaceutical   | Location | Concentration (ngL <sup>-1</sup> ) | Reference |
|-------------------|------------------|----------|------------------------------------|-----------|
| Antibiotics       | Ciprofloxacin    | Spain    | 34.6                               | [1]       |
|                   |                  | Spain    | 740                                | [2]       |
|                   |                  | Spain    | 23                                 | [3]       |
|                   |                  | Spain    | 0.53–20.00                         | [4]       |
|                   |                  | Serbia   | 28.2                               | [5]       |
|                   |                  | Spain    | 34.6                               | [6]       |
|                   |                  | Spain    | 17–540                             | [7]       |
|                   | Norfloxacin      | Spain    | 37.2                               | [1]       |
|                   |                  | Spain    | 54                                 | [2]       |
|                   |                  | Spain    | 37.2                               | [6]       |
|                   |                  | Spain    | 5–62                               | [7]       |
|                   | Ofloxacin        | Spain    | 50.2                               | [1]       |
|                   |                  | Spain    | 400                                | [2]       |
|                   |                  | Spain    | 20–33                              | [3]       |
|                   |                  | Spain    | 0.07–109.50                        | [4]       |
|                   |                  | France   | 3.2                                | [8]       |
|                   | Sulfamethoxazole | Spain    | 50.2                               | [6]       |
|                   |                  | Spain    | 15.6                               | [1]       |
|                   |                  | Portugal | 9.14–53.3                          | [9]       |
|                   |                  | Spain    | 33                                 | [2]       |
|                   |                  | USA      | 66.7                               | [10]      |
|                   |                  | Spain    | 16–79                              | [3]       |
|                   |                  | UK       | 1.8                                | [11]      |
|                   |                  | Spain    | 0.16–41.51                         | [4]       |
|                   |                  | France   | 1.9                                | [8]       |
|                   |                  | Spain    | 15.6                               | [6]       |
| Antibiotics       | Trimethoprim     | Spain    | 19–227                             | [7]       |
|                   |                  | Mexico   | 76–722                             | [12]      |
|                   |                  | Spain    | 3.0                                | [1]       |
|                   |                  | Portugal | 3.89 to 15.7                       | [9]       |
|                   | Trimethoprim     | Spain    | 151                                | [2]       |
|                   |                  | USA      | 4.1                                | [10]      |
|                   |                  | Spain    | 5–9                                | [3]       |
|                   |                  | UK       | 22                                 | [11]      |
|                   |                  | Spain    | 0.49–150.43                        | [4]       |
|                   |                  | Serbia   | 8.1                                | [5]       |
|                   |                  | France   | 0.9                                | [8]       |
|                   | Erythromycin     | Spain    | 3.0                                | [6]       |
|                   |                  | Spain    | 3–2046                             | [7]       |
|                   |                  | Mexico   | 34–120                             | [12]      |
|                   |                  | UK       | 132–1378                           | [13]      |
|                   |                  | Spain    | 78                                 | [2]       |
|                   |                  | Spain    | 0.45–18.58                         | [4]       |

|                                              |                               |          |             |      |
|----------------------------------------------|-------------------------------|----------|-------------|------|
|                                              |                               | Serbia   | 292         | [5]  |
|                                              |                               | Portugal | 38.80       | [14] |
|                                              | Erythromycin–H <sub>2</sub> O | USA      | 12.1        | [10] |
|                                              |                               | Spain    | 91          | [2]  |
|                                              | Clarithromycin                | USA      | 17.6        | [10] |
|                                              |                               | Spain    | 59          | [3]  |
|                                              |                               | UK       | 43.5        | [11] |
|                                              |                               | Spain    | 0.09–65.63  | [4]  |
|                                              |                               | Serbia   | 616         | [5]  |
|                                              |                               | Portugal | 39.10       | [14] |
|                                              | Enrofloxacin                  | Spain    | 70          | [2]  |
|                                              | Lincomycin                    | Spain    | 47          | [2]  |
|                                              | Pefloxacin                    | Spain    | 64          | [2]  |
|                                              | Roxithromycin                 | Spain    | 12          | [2]  |
|                                              |                               | France   | 4.9         | [8]  |
|                                              | Sarafloxacin                  | Spain    | 55          | [2]  |
|                                              | Sulfamethizole                | USA      | 15.6        | [10] |
|                                              | Flumequine                    | Spain    | 20          | [2]  |
|                                              | Azithromycin                  | Spain    | 5–41        | [3]  |
|                                              |                               | Spain    | 2.26–33.22  | [4]  |
|                                              |                               | Portugal | 35.66       | [14] |
|                                              | Cefalexin                     | Spain    | 0.40–1.40   | [4]  |
|                                              |                               | Serbia   | 283         | [5]  |
| Antibiotics                                  | Tetracycline                  | Spain    | 5.92–27.40  | [4]  |
|                                              | Nalidixic Acid                | Spain    | 14          | [2]  |
|                                              | Oxolinic Acid                 | Spain    | 23          | [2]  |
|                                              | Pipedimic acid                | Spain    | 245         | [2]  |
|                                              | Metronidazole                 | Spain    | 0.96–65.93  | [4]  |
|                                              |                               | France   | 0.3         | [8]  |
|                                              | Moxifloxacin                  | Spain    | 205         | [2]  |
|                                              | Mefenamic acid                | UK       | 9–97        | [13] |
|                                              | Sulfadiazine                  | Spain    | 7–51        | [7]  |
| Nonsteroidal anti-inflammatory drug (NSAIDs) | Diclofenac                    | Spain    | 16.9        | [1]  |
|                                              |                               | France   | 1.36–33.2   | [15] |
|                                              |                               | UK       | 76–2991     | [13] |
|                                              |                               | Spain    | 16.9        | [6]  |
|                                              |                               | Spain    | 358         | [2]  |
|                                              |                               | Spain    | 18–52       | [3]  |
|                                              |                               | UK       | 21.5        | [11] |
|                                              |                               | Spain    | 26.63–280   | [4]  |
|                                              |                               | Serbia   | 324         | [5]  |
|                                              |                               | France   | 5.4         | [8]  |
|                                              |                               | Spain    | 22–650      | [7]  |
|                                              |                               | Portugal | 51.24       | [14] |
|                                              | Ibuprofen                     | Mexico   | 258–1398    | [12] |
|                                              |                               | Spain    | 59.0        | [1]  |
|                                              |                               | France   | 4.5         | [15] |
|                                              |                               | UK       | 205–4838    | [13] |
|                                              |                               | Spain    | 2850        | [2]  |
|                                              |                               | USA      | 37.9        | [10] |
|                                              |                               | Spain    | 380         | [3]  |
|                                              |                               | UK       | 27.5        | [11] |
|                                              |                               | Spain    | 3.91–867.82 | [4]  |
|                                              |                               | Serbia   | 346         | [5]  |
|                                              |                               | France   | 5.5         | [8]  |
|                                              |                               | Spain    | 59          | [6]  |

|                                                     |               |          |              |      |
|-----------------------------------------------------|---------------|----------|--------------|------|
| <b>Nonsteroidal anti-inflammatory drug (NSAIDs)</b> | Ibuprofen     | Mexico   | 184–1106     | [12] |
|                                                     | Ketoprofen    | France   | 14.5         | [15] |
|                                                     |               | Spain    | 70           | [2]  |
|                                                     |               | Spain    | 6.37–356.79  | [4]  |
|                                                     |               | Serbia   | 45           | [5]  |
|                                                     |               | France   | 3.4          | [8]  |
|                                                     |               | Spain    | 4–57         | [7]  |
|                                                     | Tenoxicam     | Spain    | 0.02–1.59    | [4]  |
|                                                     | Naproxen      | France   | 9.1          | [15] |
|                                                     |               | Spain    | 285          | [2]  |
|                                                     |               | USA      | 8.2          | [10] |
|                                                     |               | Spain    | 7–156        | [3]  |
|                                                     |               | UK       | 127          | [11] |
|                                                     |               | Spain    | 12.21–289.47 | [4]  |
|                                                     |               | Serbia   | 74.2         | [5]  |
|                                                     |               | France   | 3.5          | [8]  |
|                                                     |               | Mexico   | 732–4880     | [12] |
|                                                     | Piroxicam     | Spain    | 5–11         | [3]  |
|                                                     |               | Spain    | 0.03–5.06    | [4]  |
|                                                     | Meloxicam     | Spain    | 74           | [3]  |
|                                                     |               | Spain    | 0.01–4.00    | [4]  |
|                                                     |               | Serbia   | 1.8          | [5]  |
|                                                     | Indomethacin  | Spain    | 11           | [3]  |
|                                                     |               | Spain    | 1.55–137.44  | [4]  |
|                                                     |               | Serbia   | 19.5         | [5]  |
|                                                     | Indomethacin  | Mexico   | 19–362       | [12] |
|                                                     | Phenazone     | Spain    | 12           | [3]  |
|                                                     |               | Spain    | 0.07–40.72   | [4]  |
|                                                     |               | Serbia   | 12.5         | [5]  |
| <b>Antidepressants</b>                              | Norfluoxetine | Spain    | 0.84–3.26    | [4]  |
|                                                     | Sertraline    | Spain    | 1.06–144.87  | [4]  |
|                                                     |               | Portugal | 23.30        | [14] |
| <b>Antidepressants</b>                              | Paroxetine    | Spain    | 40           | [3]  |
|                                                     | Paroxetine    | Spain)   | 0.27–3.41    | [4]  |
|                                                     | Venlafaxine   | Spain    | 575          | [2]  |
|                                                     |               | Spain    | 43           | [3]  |
|                                                     |               | UK       | 31.1         | [11] |
|                                                     |               | Spain    | 1.15–127.62  | [4]  |
|                                                     |               | Serbia   | 5.3          | [5]  |
|                                                     | Citalopram    | Spain    | 9–11         | [3]  |
|                                                     |               | Spain    | 0.08–31.83   | [4]  |
|                                                     |               | Portugal | 52.97        | [14] |
|                                                     | Trazadone     | Spain    | 4            | [3]  |
|                                                     |               | Spain    | 0.04–40.04   | [4]  |
|                                                     | Fluoxetine    | Spain    | 0.59–17.28   | [4]  |
|                                                     | Fenofibrate   | Spain    | 21.4         | [6]  |
|                                                     | Gemfibrozil   | France   | 2.3          | [15] |
|                                                     |               | USA      | 38.2         | [10] |
|                                                     |               | Spain    | 304          | [2]  |
|                                                     |               | Spain    | 9.80–302.67  | [4]  |
|                                                     |               | Spain    | 22–284       | [3]  |
|                                                     |               | Portugal | 10.34        | [14] |
|                                                     |               | Mexico   | 9–368        | [12] |
| <b>Blood lipid lowering agents</b>                  | Pravastatine  | France   | 1.6          | [8]  |
|                                                     |               | Spain    | 0.53–10.81   | [4]  |
|                                                     | Bezafibrate   | France   | 3.4          | [8]  |

|                                    |                 |          |            |      |
|------------------------------------|-----------------|----------|------------|------|
| <b>Blood lipid lowering agents</b> |                 | UK       | 42.1       | [11] |
|                                    |                 | Spain    | 49         | [2]  |
|                                    |                 | Spain    | 0.82–55.64 | [4]  |
|                                    |                 | Spain    | 16         | [3]  |
|                                    |                 | Serbia   | 18.18      | [5]  |
|                                    |                 | Spain    | 8–67       | [7]  |
|                                    |                 | Portugal | 15.52      | [14] |
|                                    | Atorvastatin    | Mexico   | 286–2100   | [12] |
|                                    |                 | UK       | 7          | [11] |
|                                    |                 | Spain    | 42         | [2]  |
|                                    |                 | Spain    | 0.12–8.64  | [4]  |
|                                    |                 | Spain    | 2–3        | [3]  |
|                                    |                 | Serbia   | 9.09       | [5]  |
|                                    | Fluvastatin     | Spain    | 0.06–4.19  | [4]  |
|                                    | Fenofibric acid | France   | 0.6        | [8]  |

**Table S2.** Pharmaceutical's concentration detected in groundwater samples (expressed in ng/L).

| Therapeutic Class                            | Pharmaceutical    | Location | Concentration (ngL <sup>-1</sup> ) | Reference |
|----------------------------------------------|-------------------|----------|------------------------------------|-----------|
| Antibiotics                                  | Azithromycin      | Spain    | 30.7–1620                          | [16]      |
|                                              | Clarithromycin    | Spain    | 2.87–20.5                          | [16]      |
|                                              | Chlortetracycline | Spain    | 34.2                               | [16]      |
|                                              | Ciprofloxacin     | Spain    | 51–443                             | [16]      |
|                                              | Danofloxacin      | Spain    | 58.7–543                           | [16]      |
|                                              | Doxycycline       | Spain    | 27.6–188                           | [16]      |
|                                              | Enoxacin          | Spain    | 69.3–323                           | [16]      |
|                                              | Enrofloxacin      | Spain    | 65.2–264                           | [16]      |
|                                              | Erythromycin      | Spain    | 41.3                               | [16]      |
|                                              | Norfloxacin       | Spain    | 81–462                             | [16]      |
|                                              | Ofloxacin         | Spain    | 43.3–367                           | [16]      |
|                                              | Oxytetracycline   | Spain    | 12.2–41                            | [16]      |
|                                              | Roxithromycin     | Spain    | 3.23–23.8                          | [16]      |
|                                              |                   | France   | 1.3                                | [8]       |
|                                              | Flumequine        | Spain    | 6.05–10.3                          | [16]      |
|                                              | Josamycin         | Spain    | 3.8                                | [16]      |
|                                              | Spiramycin        | Spain    | 17.2–2980                          | [16]      |
|                                              | Sulfadiazine      | Spain    | 37.1–208                           | [16]      |
|                                              | Sulfamethazine    | Spain    | 29.1–29.2                          | [16]      |
|                                              | Sulfamethoxazole  | Spain    | 18.2–65                            | [16]      |
|                                              |                   | France   | 3.0                                | [8]       |
|                                              | Tetracycline      | Spain    | 56.3–141                           | [16]      |
|                                              | Tilmicosin        | Spain    | 5.71–820                           | [16]      |
|                                              | Trimethoprim      | Spain    | 4.89–9.41                          | [16]      |
|                                              |                   | France   | 1.4                                | [8]       |
| Nonsteroidal anti-inflammatory drug (NSAIDs) | Diclofenac        | Spain    | 1.17–380                           | [16]      |
|                                              |                   | France   | 9.7                                | [8]       |
|                                              | Ibuprofen         | Serbia   | 92                                 | [5]       |
|                                              |                   | Spain    | 2.12–988                           | [16]      |
|                                              | Naproxen          | Serbia   | 27.6                               | [5]       |
| Nonsteroidal anti-inflammatory drug (NSAIDs) |                   | Spain    | 5.59                               | [16]      |
|                                              | Naproxen          | France   | 1.2                                | [8]       |
|                                              | Phenazone         | Serbia   | 23.4                               | [5]       |
|                                              |                   | Spain    | 2.13–39.7                          | [16]      |
|                                              | Ketoprofen        | Spain    | 29.5–215                           | [16]      |
|                                              |                   | France   | [8]                                | [8]       |
|                                              | Mefenamic acid    | Spain    | 13.5–64.3                          | [16]      |

|                             |                 |        |            |      |
|-----------------------------|-----------------|--------|------------|------|
| Antidepressants             | Fluoxetine      | Spain  | 21         | [16] |
|                             | Paroxetine      | Spain  | 5.17–30.2  | [16] |
| Blood lipid lowering agents | Fenofibric acid | France | 0.4        | [8]  |
|                             | Atorvastatin    | Spain  | 5.12–15.9  | [16] |
|                             | Bezafibrate     | Spain  | 0.527–25.8 | [16] |
|                             | Fenofibrate     | Spain  | 22.3–74.2  | [16] |
|                             | Gemfibrozil     | Spain  | 0.821–751  | [16] |
|                             | Pravastatin     | Spain  | 12.2       | [16] |

**Table S3.** Pharmaceutical's concentration detected in seawater samples (expressed in ng/L).

| Therapeutic Class                            | Pharmaceutical   | Location | Concentration (ngL <sup>-1</sup> ) | Reference |
|----------------------------------------------|------------------|----------|------------------------------------|-----------|
| Antibiotics                                  | Clarithromycin   | Spain    | 17                                 | [3]       |
|                                              | Ofloxacin        | Spain    | 2                                  | [3]       |
|                                              | Sulfamethoxazole | Spain    | 9                                  | [3]       |
|                                              | Trimethoprim     | Spain    | 1                                  | [3]       |
| Nonsteroidal anti-inflammatory drug (NSAIDs) | Diclofenac       | Spain    | 4                                  | [3]       |
|                                              | Ibuprofen        | Spain    | 16                                 | [3]       |
|                                              | Indomethacin     | Spain    | 3                                  | [3]       |
|                                              | Naproxen         | Spain    | 6                                  | [3]       |
|                                              | Phenazone        | Spain    | 2                                  | [3]       |
| Antidepressants                              | Citalopram       | Spain    | 4                                  | [3]       |
|                                              | Venlafaxine      | Spain    | 52                                 | [3]       |
|                                              | Trazadone        | Spain    | 1                                  | [3]       |
| Blood lipid lowering agents                  | Gemfibrozil      | Spain    | 23                                 | [3]       |
|                                              | Atorvastatin     | Spain    | 1                                  | [3]       |
|                                              | Bezafibrate      | Spain    | 2                                  | [3]       |

**Table S4.** Pharmaceutical's concentration detected in drinking water samples (expressed in ng/L).

| Therapeutic Class                            | Pharmaceutical                | Location       | Concentration (ngL <sup>-1</sup> ) | Reference |
|----------------------------------------------|-------------------------------|----------------|------------------------------------|-----------|
| Antibiotics                                  | Sulfamethoxazole              | Spain          | 0.5                                | [3]       |
|                                              |                               | Portugal       | 1.3                                | [17]      |
|                                              |                               | USA            | 12.7                               | [18]      |
|                                              |                               | USA            | 1.3–8.2                            | [19]      |
|                                              |                               | USA            | 113                                | [20]      |
|                                              |                               | Switzerland    | 15–17                              | [21]      |
|                                              | Sulfadiazine                  | Portugal       | 1                                  | [17]      |
|                                              | Sulfamethazine                | Portugal       | 0.5                                | [17]      |
|                                              | Sulfapyridine                 | Portugal       | 1.9                                | [17]      |
|                                              | Erythromycin                  | Portugal       | 5                                  | [17]      |
|                                              | Erythromycin-H <sub>2</sub> O | USA            | 13.8                               | [18]      |
|                                              | Clarithromycin                | USA            | 0.2                                | [18]      |
|                                              | Trimethoprim                  | USA            | 19.8                               | [18]      |
|                                              |                               | USA            | 1.7–4.7                            | [19]      |
|                                              |                               | USA            | 0.7                                | [20]      |
|                                              |                               | Switzerland    | 0.4–3                              | [21]      |
|                                              | Sulfamethizole                | USA            | 1                                  | [20]      |
|                                              | Lincomycin                    | USA            | 2.0–4.4                            | [19]      |
|                                              | Azithromycin                  | Switzerland    | 10                                 | [21]      |
|                                              | Norfloxacin                   | Switzerland    | 2                                  | [21]      |
| Nonsteroidal anti-inflammatory drug (NSAIDs) | Ibuprofen                     | USA (raw)      | 5850                               | [22]      |
|                                              |                               | USA (finished) | 930                                |           |
|                                              |                               | France         | 0.6                                | [15]      |
|                                              |                               | Spain          | 5                                  | [3]       |
|                                              |                               | Portugal       | 0.021                              | [17]      |
|                                              |                               | USA            | 10.2                               | [18]      |

|                                              |                |             |          |      |
|----------------------------------------------|----------------|-------------|----------|------|
| Nonsteroidal anti-inflammatory drug (NSAIDs) | Diclofenac     | USA         | 2.0–72.8 | [19] |
|                                              |                | Spain       | 21.24    | [6]  |
|                                              |                | France      | 2.5      | [15] |
|                                              |                | Portugal    | 11       | [17] |
|                                              |                | USA         | 9.4      | [18] |
|                                              | Diclofenac     | Switzerland | 0.7–3    | [21] |
|                                              | Ketoprofen     | France      | 3.0      | [15] |
|                                              |                | Serbia      | 16       | [5]  |
|                                              |                | Switzerland | 4–8      | [21] |
|                                              | Naproxen       | France      | 0.2      | [15] |
|                                              |                | Portugal    | 6        | [17] |
|                                              |                | USA         | 5.1      | [18] |
|                                              |                | Switzerland | 4–12     | [21] |
|                                              | Indomethacin   | Spain       | 6        | [3]  |
|                                              |                | Portugal    | 37       | [17] |
| Antidepressants                              | Nimesulide     | Portugal    | 27       | [17] |
|                                              | Fluoxetine     | USA         | 19.2     | [18] |
|                                              | Amitryptilline | France      | 1.4      | [15] |
| Blood lipid lowering agents                  | Gemfibrozil    | USA         | 1.2      | [20] |
|                                              |                | Portugal    | 18       | [17] |
|                                              |                | Spain       | 8        | [3]  |
|                                              | Atorvastatin   | Spain       | 1        | [3]  |

**Table S5.** Pharmaceutical's concentration detected in sediment and soils samples (expressed in ng/g).

| Therapeutic Class | Pharmaceutical                | Location | Concentration (ng g <sup>-1</sup> ) | Reference |
|-------------------|-------------------------------|----------|-------------------------------------|-----------|
| Antibiotics       | Ciprofloxacin                 | Spain    | 4.6–7.3                             | [1]       |
|                   |                               | Spain    | 5.95                                | [6]       |
|                   |                               | Spain    | 0.10–3.79                           | [4]       |
|                   |                               | China    | 42                                  | [23]      |
|                   | Norfloxacin                   | Spain    | 6.8–8.4                             | [1]       |
|                   |                               | Malaysia | 18–96                               | [24]      |
|                   |                               | China    | 17.9                                | [23]      |
|                   | Ofloxacin                     | Spain    | 8.95–12.03                          | [6]       |
|                   |                               | Spain    | 0.09–2.99                           | [4]       |
|                   |                               | Spain    | 2.7–3.3                             | [1]       |
|                   | Sulfamethoxazole              | Spain    | 1.1                                 | [1]       |
|                   |                               | USA      | 0.7                                 | [10]      |
|                   |                               | Spain    | 0.07–0.26                           | [4]       |
|                   |                               | Poland   | 2.34–419.2                          | [25]      |
|                   | Tetracycline                  | Spain    | 6.5                                 | [1]       |
|                   |                               | Spain    | 5.92                                | [4]       |
|                   | Trimethoprim                  | Spain    | 0.2–1.6                             | [1]       |
|                   |                               | Spain    | 0.02–0.25                           | [26]      |
|                   |                               | USA      | 18.2                                | [10]      |
|                   |                               | Spain    | 0.03–0.19                           | [4]       |
|                   |                               | Poland   | 1.74–2.46                           | [25]      |
|                   |                               | Malaysia | 3–60                                | [24]      |
|                   | Sulfamethoxypyridazine        | Spain    | 0.11–0.37                           | [26]      |
|                   | Sulfamethazine                | Spain    | 0.24–1.15                           | [26]      |
|                   |                               | Poland   | 1.76                                | [25]      |
|                   | Erithromycin                  | Spain    | 1.13                                | [4]       |
|                   | Erithromycin-H <sub>2</sub> O | USA      | 3.4                                 | [10]      |
|                   | Azithromycin                  | Spain    | 23.92                               | [4]       |
|                   | Clarithromycin                | Spain    | 12.72                               | [4]       |
|                   | Cefalexin                     | Spain    | 0.40                                | [4]       |

|                                              |                       |          |              |      |
|----------------------------------------------|-----------------------|----------|--------------|------|
| Antibiotics                                  | Metronidazole         | Spain    | 0.12–12.61   | [4]  |
|                                              | Sulfamethiazole       | Poland   | 12.85–20.84  | [25] |
|                                              | Doxycycline           | Malaysia | 63–728       | [24] |
|                                              | Enrofloxacin          | Malaysia | 36–378       | [24] |
|                                              |                       | China    | 24.4         | [23] |
|                                              |                       | Brazil   | 26.69        | [27] |
|                                              | Flumequine            | Malaysia | 8–1331       | [24] |
|                                              | Tylosin               | Malaysia | 6–679        | [24] |
|                                              | Lomefloxacin          | China    | 11           | [23] |
|                                              | Sulfachloropyridazine | Poland   | 0.47–1.07    | [25] |
|                                              | Sulfathiazole         | Poland   | 1.77         | [25] |
|                                              | Chloramphenicol       | Spain    | 0.17–2.10    | [26] |
| Nonsteroidal anti-inflammatory drug (NSAIDs) | Diclofenac            | Spain    | 0.81–15.39   | [26] |
|                                              |                       | Spain    | 1.29–4.14    | [4]  |
|                                              |                       | Poland   | 2.1          | [28] |
|                                              |                       | Spain    | 0.91–24.93   | [26] |
|                                              | Ibuprofen             | Spain    | 12.56        | [4]  |
|                                              |                       | Poland   | 1.0–8.0      | [28] |
|                                              |                       | Spain    | 0.47–8.99    | [26] |
|                                              | Indomethacin          | Spain    | 0.47–2.94    | [4]  |
|                                              |                       | Spain    | 0..06        | [4]  |
|                                              | Phenazone             | Spain    | 0..06        | [4]  |
|                                              | Ketoprofen            | Spain    | 5.79–12.54   | [4]  |
|                                              | Naproxen              | Spain    | 0.82–3.38    | [4]  |
|                                              | Piroxicam             | Spain    | 0.15         | [4]  |
|                                              | Meloxicam             | Spain    | 0.08         | [4]  |
|                                              | Tenoxicam             | Spain    | 0.66         | [4]  |
|                                              | Flurbiprofen          | Poland   | 6.5–8.8      | [28] |
|                                              | Mefenamic acid        | Spain    | 0.18–3.34    | [26] |
| Antidepressants                              | Fluoxetine            | Spain    | 0.34         | [4]  |
|                                              | Norfluoxetine         | Spain    | 0.14–0.60    | [4]  |
|                                              | Paroxetine            | Spain    | 0.05–0.76    | [4]  |
|                                              | Sertraline            | Spain    | 1.15– 119.28 | [4]  |
|                                              | Citalopram            | Spain    | 0.23–7.79    | [4]  |
|                                              | Venlafaxine           | Spain    | 0.05–1.94    | [4]  |
| Antidepressants                              | Trazodone             | Spain    | 0.09–8.08    | [4]  |
| Blood lipid lowering agents                  | Bezafibrate           | Spain    | 0.09–0.41    | [4]  |
|                                              | Gemfibrozil           | Spain    | 0.16–1.92    | [4]  |
|                                              |                       | Spain    | 0.08–0.39    | [26] |
|                                              | Atorvastatin          | Spain    | 0.03–0.65    | [4]  |
|                                              | Pravastatin           | Spain    | 0.30         | [4]  |
|                                              | Fluvastatin           | Spain    | 0.22–4.53    | [4]  |
|                                              | Fenofibrate           | Spain    | 16.1         | [1]  |
|                                              |                       | Spain    | 13.20–17.23  | [6]  |

**Table S6.** Pharmaceutical's concentration detected in sludge samples (expressed in ng/g).

| Therapeutic Class                            | Pharmaceutical        | Location | Concentration (ng g <sup>-1</sup> ) | Reference |
|----------------------------------------------|-----------------------|----------|-------------------------------------|-----------|
| Antibiotics                                  | Trimethoprim          | UK       | 21.5                                | [11]      |
|                                              |                       | Malaysia | 9–3412                              | [24]      |
|                                              | Doxycycline           | Malaysia | 309–78516                           | [24]      |
|                                              |                       | China    | 1050–10910                          | [29]      |
|                                              | Enrofloxacin          | Malaysia | 112–26863                           | [24]      |
|                                              |                       | Brazil   | 30970                               | [27]      |
|                                              |                       | China    | 33260–1420760                       | [29]      |
|                                              | Erythromycin          | Malaysia | 12–32                               | [24]      |
|                                              | Norfloxacin           | Malaysia | 31–1886                             | [24]      |
|                                              |                       | Brazil   | 4550                                | [27]      |
|                                              |                       | China    | 2760–225450                         | [29]      |
|                                              | Sulfadiazine          | Malaysia | 12–5773                             | [24]      |
|                                              |                       | China    | 800–3120                            | [27]      |
|                                              | Tilmicosin            | Malaysia | 13–85                               | [24]      |
|                                              | Tylosin               | Malaysia | 100–13740                           | [24]      |
|                                              | Ciprofloxacin         | Brazil   | 2130                                | [27]      |
|                                              |                       | China    | 29590–45590                         | [29]      |
|                                              | Fleroxacin            | China    | 2220–99430                          | [29]      |
|                                              | Flumequine            | Malaysia | 21–51912                            | [24]      |
|                                              | Sulfamethoxazole      | China    | 840–2800                            | [29]      |
|                                              | Oxytetracycline       | China    | 10560–59590                         | [29]      |
|                                              | Chlortetracycline     | China    | 17680–27590                         | [29]      |
|                                              | Methacycline          | China    | 960–5860                            | [29]      |
|                                              | Lomefloxacin          | China    | 5530–44160                          | [29]      |
|                                              | Danofloxacin          | China    | 2480–3060                           | [29]      |
|                                              | Sulfanilamide         | China    | 40–1590                             | [29]      |
|                                              | Sulfamerazine         | China    | 90–660                              | [29]      |
|                                              | Sulfadimidine         | China    | 180–6040                            | [29]      |
|                                              | Difloxacin            | China    | 2630–12380                          | [29]      |
|                                              | Sulfamonomethoxine    | China    | 60–4080                             | [29]      |
|                                              | Sulfaguanidine        | China    | 250–1550                            | [29]      |
|                                              | Sulfachloropyridazine | China    | 360–3510                            | [29]      |
| Nonsteroidal anti-inflammatory drug (NSAIDs) | Ibuprofen             | UK       | 174                                 | [11]      |
|                                              |                       | Poland   | 96                                  | [28]      |
|                                              | Diclofenac            | UK       | 23.5                                | [11]      |
|                                              |                       | Poland   | 20                                  | [28]      |
|                                              | Naproxen              | UK       | 39.8                                | [11]      |
|                                              |                       | Poland   | 10                                  | [28]      |
| Antidepressants                              | Flurbiprofen          | Poland   | 98                                  | [28]      |
|                                              | Citalopram            | UK       | 657                                 | [11]      |
|                                              | Venlafaxine           | UK       | 37.9                                | [11]      |
|                                              | Fluoxetine            | UK       | 188                                 | [11]      |
|                                              | Sertraline            | UK       | 1138                                | [11]      |
|                                              | Norfluoxetine         | UK       | 124                                 | [11]      |
|                                              | Mirtazapine           | UK       | 66.1                                | [11]      |



**Table S7.** Pharmaceutical's concentration detected in wastewaters effluent samples (expressed in ng/L).

| Therapeutic Class | Pharmaceutical   | Location | Concentration (ng L <sup>-1</sup> ) | Reference |
|-------------------|------------------|----------|-------------------------------------|-----------|
| Antibiotics       | Erythromycin     | UK       | 466–1857                            | [13]      |
|                   |                  | Spain    | 82                                  | [2]       |
|                   |                  | Spain    | 14–17                               | [3]       |
|                   |                  | China    | 42–244.0                            | [30]      |
|                   | Ciprofloxacin    | Spain    | 2292                                | [2]       |
|                   |                  | Spain    | 104–245                             | [3]       |
|                   |                  | USA      | 2200                                | [31]      |
|                   |                  | Serbia   | 278                                 | [5]       |
|                   | Clarithromycin   | Spain    | 3194–4719                           | [7]       |
|                   |                  | Spain    | 247                                 | [2]       |
|                   |                  | Spain    | 19–192                              | [3]       |
|                   |                  | UK       | 1065                                | [11]      |
|                   | Enrofloxacin     | USA      | 8100                                | [31]      |
|                   |                  | Spain    | 220                                 | [2]       |
|                   |                  | USA      | 34                                  | [31]      |
|                   | Flumequine       | Spain    | 41                                  | [2]       |
|                   |                  | USA      | 15.6                                | [31]      |
|                   | Lincomycin       | Spain    | 142                                 | [2]       |
|                   |                  | USA      | 32                                  | [31]      |
|                   | Nalidixic acid   | Spain    | 60                                  | [2]       |
|                   | Moxifloxacin     | Spain    | 540                                 | [2]       |
|                   |                  | China    | 5.1–7.7                             | [30]      |
|                   | Azithromycin     | Spain    | 31–170                              | [3]       |
|                   |                  | UK       | 87.2                                | [11]      |
|                   |                  | China    | 20.7–446.5                          | [30]      |
|                   |                  | USA      | 1300                                | [31]      |
|                   | Ofloxacin        | Spain    | 157–191                             | [3]       |
|                   |                  | China    | 26.7–310.0                          | [30]      |
|                   |                  | USA      | 2100                                | [31]      |
|                   |                  | Serbia   | 220                                 | [5]       |
|                   | Sulfamethoxazole | Spain    | 925                                 | [2]       |
|                   |                  | Spain    | 222                                 | [3]       |
| Antibiotics       | Sulfamethoxazole | UK       | 47.5                                | [11]      |
|                   |                  | China    | 44.5–1296.3                         | [30]      |
|                   |                  | USA      | 7400                                | [31]      |
|                   |                  | Serbia   | 432                                 | [5]       |
|                   |                  | Spain    | 432                                 | [2]       |
|                   |                  | Spain    | 190–8963                            | [7]       |
|                   |                  | Mexico   | 440–1215                            | [12]      |
|                   |                  | Spain    | 10–100                              | [3]       |
|                   | Trimethoprim     | UK       | 769                                 | [11]      |
|                   |                  | China    | 6.7–188.0                           | [30]      |
|                   |                  | USA      | 570                                 | [31]      |
|                   |                  | Serbia   | 259                                 | [5]       |
|                   |                  | Spain    | 232                                 | [2]       |
|                   |                  | Spain    | 61–5843                             | [7]       |
|                   |                  | Mexico   | 130–395                             | [12]      |
|                   | Sulfamerazine    | USA      | 30                                  | [31]      |
|                   | Sulfamethizole   | USA      | 60                                  | [31]      |
|                   | Cefalexin        | Serbia   | 803                                 | [5]       |
|                   | Ampicillin       | USA      | 160                                 | [31]      |
|                   | Penicillin G     | USA      | 30                                  | [31]      |
|                   | Penicillin V     | USA      | 86                                  | [31]      |

|                                              |                       |        |             |      |
|----------------------------------------------|-----------------------|--------|-------------|------|
| Antibiotics                                  | Sarafloxacin          | USA    | 130         | [31] |
|                                              |                       | Spain  | 52          | [2]  |
|                                              | Sulfadiazine          | China  | 14–189.7    | [30] |
|                                              |                       | USA    | 20          | [31] |
|                                              |                       | Spain  | 24–5477     | [7]  |
|                                              | Sulfamethazine        | China  | 2–48.6      | [30] |
|                                              |                       | USA    | 40          | [31] |
|                                              |                       | Spain  | 11          | [2]  |
|                                              | Sulfadimethoxine      | USA    | 52          | [31] |
|                                              | Sulfachloropyridazine | USA    | 30          | [31] |
|                                              | Pefloxacin            | Spain  | 122         | [2]  |
|                                              | Norfloxacin           | China  | 9.4–134.3   | [30] |
|                                              |                       | USA    | 140         | [31] |
| Nonsteroidal anti-inflammatory drug (NSAIDs) | Norfloxacin           | Spain  | 310         | [2]  |
|                                              |                       | Spain  | 40–463      | [7]  |
|                                              |                       | China  | 36.5–512.4  | [30] |
|                                              | Roxithromycin         | USA    | 120         | [31] |
|                                              |                       | Spain  | 18          | [2]  |
|                                              |                       | USA    | 92          | [31] |
|                                              | Sulfathiazole         | Spain  | 30          | [2]  |
|                                              |                       | Spain  | 430         | [2]  |
|                                              | Pipedimic acid        | Spain  | 430         | [2]  |
|                                              | Mefenamic acid        | UK     | 15–108      | [13] |
|                                              | Metronidazole         | Spain  | 121         | [3]  |
|                                              | Diclofenac            | France | 210.7–486.4 | [15] |
|                                              |                       | UK     | 401–2830    | [13] |
|                                              |                       | Spain  | 690         | [2]  |
|                                              |                       | Spain  | 184–376     | [3]  |
|                                              |                       | UK     | 436         | [11] |
|                                              |                       | China  | 1.0–4.7     | [30] |
|                                              |                       | Serbia | 1338        | [5]  |
|                                              |                       | Mexico | 466–2180    | [12] |
|                                              |                       | Spain  | 683–1932    | [7]  |
|                                              |                       | France | 17.7–219.0  | [15] |
| Nonsteroidal anti-inflammatory drug (NSAIDs) | Ibuprofen             | UK     | 863–4617    | [13] |
|                                              |                       | Spain  | 15100       | [2]  |
|                                              |                       | UK     | 1290        | [11] |
|                                              |                       | China  | 3.5–41.6.   | [30] |
|                                              |                       | USA    | 4500        | [31] |
|                                              |                       | Serbia | 20130       | [5]  |
|                                              |                       | France | 21.8–1080.6 | [15] |
|                                              | Ketoprofen            | Spain  | 583         | [2]  |
|                                              |                       | Spain  | 39–560      | [3]  |
|                                              |                       | Serbia | 247         | [5]  |
|                                              |                       | Spain  | 13–374      | [7]  |
|                                              |                       | France | 42.1–289.1  | [15] |
| Nonsteroidal anti-inflammatory drug (NSAIDs) | Naproxen              | Spain  | 710         | [2]  |
|                                              |                       | Spain  | 97–150      | [3]  |
|                                              |                       | UK     | 3516        | [11] |
|                                              |                       | USA    | 3000        | [31] |
|                                              |                       | Serbia | 208         | [5]  |
|                                              |                       | China  | 6.7–7.7     | [30] |
|                                              |                       | Mexico | 49–392      | [12] |
|                                              | Phenazone             | Spain  | 9–49        | [3]  |
|                                              |                       | Serbia | 13.5        | [5]  |
|                                              | Piroxicam             | Spain  | 87          | [3]  |
|                                              | Meloxicam             | Spain  | 735         | [3]  |

|                             |                 |        |           |      |
|-----------------------------|-----------------|--------|-----------|------|
| Antidepressants             |                 | Serbia | 5.0       | [5]  |
|                             | Tenoxicam       | Spain  | 19        | [3]  |
|                             | Indomethacin    | Mexico | 38–305    | [12] |
|                             | Citalopram      | Spain  | 49–288    | [3]  |
|                             |                 | UK     | 323       | [11] |
|                             |                 | China  | 2–162     | [32] |
|                             | Venlafaxine     | Spain  | 364–376   | [3]  |
|                             |                 | UK     | 355       | [11] |
|                             |                 | Serbia | 154       | [5]  |
|                             | Trazodone       | Spain  | 875       | [2]  |
|                             | Amitryptiline   | Spain  | 29        | [3]  |
|                             | Fluoxetine      | France | 6.0       | [15] |
|                             |                 | Spain  | 28        | [3]  |
|                             |                 | UK     | 26.5      | [11] |
|                             | Paroxetine      | China  | 10        | [32] |
|                             |                 | USA    | 50        | [31] |
|                             |                 | Spain  | 386       | [3]  |
|                             | Sertraline      | UK     | 47        | [11] |
|                             |                 | China  | 9–59      | [32] |
|                             | Mirtazapine     | UK     | 55        | [11] |
|                             | Chlorimipramine | China  | 4–35      | [32] |
|                             | Norfluoxetine   | UK     | 30        | [11] |
| Blood lipid lowering agents | Gemfibrozil     | France | 13.3–17.2 | [15] |
|                             |                 | USA    | 190       | [31] |
|                             |                 | China  | 0.6–10.2  | [30] |
|                             |                 | Spain  | 2008      | [2]  |
|                             |                 | Spain  | 178–1018  | [3]  |
|                             | Bezafibrate     | Mexico | 20–380    | [12] |
|                             |                 | China  | 2.7–128.1 | [30] |
|                             |                 | UK     | 892       | [11] |
|                             |                 | Spain  | 312       | [2]  |
|                             |                 | Spain  | 7–26      | [3]  |
|                             |                 | Spain  | 40–132    | [7]  |
|                             |                 | Mexico | 265–950   | [12] |
|                             | Atorvastatin    | China  | 0.7–0.8   | [30] |
|                             |                 | UK     | 60.5      | [11] |
|                             |                 | Spain  | 209       | [2]  |
|                             |                 | Spain  | 27–111    | [3]  |
|                             |                 | Serbia | 40.5      | [5]  |
|                             | Pravastatin     | Canada | 10–122    | [33] |
|                             |                 | Spain  | 69        | [2]  |
|                             |                 | Spain  | 36        | [3]  |
|                             | Fluvastatin     | Spain  | 12        | [3]  |
|                             | Simvastatin     | China  | 8.4–129   | [30] |
|                             | Rosuvastatin    | Canada | 190–552   | [33] |

## References

1. Vazquez-Roig, P.; Andreu, V.; Blasco, C.; Picó, Y. Risk assessment on the presence of pharmaceuticals in sediments, soils and waters of the Pego–Oliva Marshlands (Valencia, eastern Spain). *Sci. Total Environ.* **2012**, *440*, 24–32, doi:10.1016/j.scitotenv.2012.08.036.
2. Gracia-Lor, E.; Sancho, J. V.; Hernández, F. Multi-class determination of around 50 pharmaceuticals, including 26 antibiotics, in environmental and wastewater samples by ultra-high performance liquid chromatography–tandem mass spectrometry. *J. Chromatogr. A* **2011**, *1218*, 2264–2275, doi:10.1016/j.chroma.2011.02.026.

3. Gros, M.; Rodríguez-Mozaz, S.; Barceló, D. Fast and comprehensive multi-residue analysis of a broad range of human and veterinary pharmaceuticals and some of their metabolites in surface and treated waters by ultra-high-performance liquid chromatography coupled to quadrupole-linear ion trap tandem. *J. Chromatogr. A* **2012**, *1248*, 104–121, doi:10.1016/j.chroma.2012.05.084.
4. Osorio, V.; Larrañaga, A.; Aceña, J.; Pérez, S.; Barceló, D. Concentration and risk of pharmaceuticals in freshwater systems are related to the population density and the livestock units in Iberian Rivers. *Sci. Total Environ.* **2016**, *540*, 267–277, doi:10.1016/j.scitotenv.2015.06.143.
5. Petrović, M.; Škrbić, B.; Živančev, J.; Ferrando-Climent, L.; Barcelo, D. Determination of 81 pharmaceutical drugs by high performance liquid chromatography coupled to mass spectrometry with hybrid triple quadrupole–linear ion trap in different types of water in Serbia. *Sci. Total Environ.* **2014**, *468*, 415–428, doi:10.1016/j.scitotenv.2013.08.079.
6. Vazquez-Roig, P.; Segarra, R.; Blasco, C.; Andreu, V.; Picó, Y. Determination of pharmaceuticals in soils and sediments by pressurized liquid extraction and liquid chromatography tandem mass spectrometry. *J. Chromatogr. A* **2010**, *1217*, 2471–2483, doi:10.1016/j.chroma.2009.11.033.
7. Mijangos, L.; Ziarrusta, H.; Ros, O.; Kortazar, L.; Fernández, L.A.; Olivares, M.; Zuloaga, O.; Prieto, A.; Etxebarria, N. Occurrence of emerging pollutants in estuaries of the Basque Country: Analysis of sources and distribution, and assessment of the environmental risk. *Water Res.* **2018**, *147*, 152–163, doi:10.1016/j.watres.2018.09.033.
8. Vulliet, E.; Cren-Olivé, C. Screening of pharmaceuticals and hormones at the regional scale, in surface and groundwaters intended to human consumption. *Environ. Pollut.* **2011**, *159*, 2929–2934, doi:10.1016/j.envpol.2011.04.033.
9. Madureira, T.V.; Barreiro, J.C.; Rocha, M.J.; Rocha, E.; Cass, Q.B.; Tiritan, M.E. Spatiotemporal distribution of pharmaceuticals in the Douro River estuary (Portugal). *Sci. Total Environ.* **2010**, *408*, 5513–5520, doi:10.1016/j.scitotenv.2010.07.069.
10. Klosterhaus, S.L.; Grace, R.; Hamilton, M.C.; Yee, D. Method validation and reconnaissance of pharmaceuticals, personal care products, and alkylphenols in surface waters, sediments, and mussels in an urban estuary. *Environ. Int.* **2013**, *54*, 92–99, doi:10.1016/j.envint.2013.01.009.
11. Petrie, B.; Youdan, J.; Barden, R.; Kasprzyk-Hordern, B. Multi-residue analysis of 90 emerging contaminants in liquid and solid environmental matrices by ultra-high-performance liquid chromatography tandem mass spectrometry. *J. Chromatogr. A* **2016**, *1431*, 64–78, doi:10.1016/j.chroma.2015.12.036.
12. Rivera-Jaimes, J.A.; Postigo, C.; Melgoza-Alemán, R.M.; Aceña, J.; Barceló, D.; López de Alda, M. Study of pharmaceuticals in surface and wastewater from Cuernavaca, Morelos, Mexico: Occurrence and environmental risk assessment. *Sci. Total Environ.* **2018**, *613*, 1263–1274, doi:10.1016/j.scitotenv.2017.09.134.
13. Kay, P.; Hughes, S.R.; Ault, J.R.; Ashcroft, A.E.; Brown, L.E. Widespread, routine occurrence of pharmaceuticals in sewage effluent, combined sewer overflows and receiving waters. *Environ. Pollut.* **2017**, *220*, 1447–1455, doi:10.1016/j.envpol.2016.10.087.
14. Pereira, A.M.P.T.; Silva, L.J.G.; Laranjeiro, C.S.M.; Meisel, L.M.; Lino, C.M.; Pena, A. Human pharmaceuticals in Portuguese rivers: The impact of water scarcity in the environmental risk. *Sci. Total Environ.* **2017**, *609*, 1182–1191, doi:10.1016/j.scitotenv.2017.07.200.
15. Togola, A.; Budzinski, H. Multi-residue analysis of pharmaceutical compounds in aqueous samples. *J. Chromatogr. A* **2008**, *1177*, 150–158, doi:10.1016/j.chroma.2007.10.105.
16. López-Serna, R.; Jurado, A.; Vázquez-Suñé, E.; Carrera, J.; Petrović, M.; Barceló, D. Occurrence of 95 pharmaceuticals and transformation products in urban groundwaters underlying the metropolis of Barcelona, Spain. *Environ. Pollut.* **2013**, *174*, 305–315, doi:10.1016/j.envpol.2012.11.022.

17. Gaffney, V.J.; Almeida, C.M.M.; Rodrigues, A.; Ferreira, E.; Benoliel, M.J.; Cardoso, V.V. Occurrence of pharmaceuticals in a water supply system and related human health risk assessment. *Water Res.* **2015**, *72*, 199–208, doi:10.1016/j.watres.2014.10.027.
18. Padhye, L.P.; Yao, H.; Kung'u, F.T.; Huang, C.-H. Year-long evaluation on the occurrence and fate of pharmaceuticals, personal care products, and endocrine disrupting chemicals in an urban drinking water treatment plant. *Water Res.* **2014**, *51*, 266–276, doi:10.1016/j.watres.2013.10.070.
19. Wang, C.; Shi, H.; Adams, C.D.; Gamagedara, S.; Stayton, I.; Timmons, T.; Ma, Y. Investigation of pharmaceuticals in Missouri natural and drinking water using high performance liquid chromatography-tandem mass spectrometry. *Water Res.* **2011**, *45*, 1818–1828, doi:10.1016/j.watres.2010.11.043.
20. Schaidler, L.A.; Rudel, R.A.; Ackerman, J.M.; Dunagan, S.C.; Brody, J.G. Pharmaceuticals, perfluorosurfactants, and other organic wastewater compounds in public drinking water wells in a shallow sand and gravel aquifer. *Sci. Total Environ.* **2014**, *468*, 384–393, doi:10.1016/j.scitotenv.2013.08.067.
21. Morasch, B. Occurrence and dynamics of micropollutants in a karst aquifer. *Environ. Pollut.* **2013**, *173*, 133–137, doi:10.1016/j.envpol.2012.10.014.
22. Loraine, G.A.; Pettigrove, M.E. Seasonal Variations in Concentrations of Pharmaceuticals and Personal Care Products in Drinking Water and Reclaimed Wastewater in Southern California. *Environ. Sci. Technol.* **2006**, *40*, 687–695, doi:10.1021/es051380x.
23. Wu, X.-L.; Xiang, L.; Yan, Q.-Y.; Jiang, Y.-N.; Li, Y.-W.; Huang, X.-P.; Li, H.; Cai, Q.-Y.; Mo, C.-H. Distribution and risk assessment of quinolone antibiotics in the soils from organic vegetable farms of a subtropical city, Southern China. *Sci. Total Environ.* **2014**, *487*, 399–406, doi:10.1016/j.scitotenv.2014.04.015.
24. Ho, Y. Bin; Zakaria, M.P.; Latif, P.A.; Saari, N. Occurrence of veterinary antibiotics and progesterone in broiler manure and agricultural soil in Malaysia. *Sci. Total Environ.* **2014**, *488*, 261–267, doi:10.1016/j.scitotenv.2014.04.109.
25. Siedlewicz, G.; Borecka, M.; Białk-Bielińska, A.; Sikora, K.; Stepnowski, P.; Pazdro, K. Determination of antibiotic residues in southern Baltic Sea sediments using tandem solid-phase extraction and liquid chromatography coupled with tandem mass spectrometry. *Oceanologia* **2016**, *58*, 221–234, doi:10.1016/j.oceano.2016.04.005.
26. Biel-Maeso, M.; Corada-Fernández, C.; Lara-Martín, P.A. Determining the distribution of pharmaceutically active compounds (PhACs) in soils and sediments by pressurized hot water extraction (PHWE). *Chemosphere* **2017**, *185*, 1001–1010, doi:10.1016/j.chemosphere.2017.07.094.
27. Leal, R.M.P.; Figueira, R.F.; Tornisielo, V.L.; Regitano, J.B. Occurrence and sorption of fluoroquinolones in poultry litters and soils from São Paulo State, Brazil. *Sci. Total Environ.* **2012**, *432*, 344–349, doi:10.1016/j.scitotenv.2012.06.002.
28. Kumirska, J.; Migowska, N.; Caban, M.; Łukaszewicz, P.; Stepnowski, P. Simultaneous determination of non-steroidal anti-inflammatory drugs and oestrogenic hormones in environmental solid samples. *Sci. Total Environ.* **2015**, *508*, 498–505, doi:10.1016/j.scitotenv.2014.12.020.
29. Zhao, L.; Dong, Y.H.; Wang, H. Residues of veterinary antibiotics in manures from feedlot livestock in eight provinces of China. *Sci. Total Environ.* **2010**, *408*, 1069–1075, doi:10.1016/j.scitotenv.2009.11.014.
30. Yan, Q.; Gao, X.; Chen, Y.-P.; Peng, X.-Y.; Zhang, Y.-X.; Gan, X.-M.; Zi, C.-F.; Guo, J.-S. Occurrence, fate and ecotoxicological assessment of pharmaceutically active compounds in wastewater and sludge from wastewater treatment plants in Chongqing, the Three Gorges Reservoir Area. *Sci. Total Environ.* **2014**, *470*, 618–630, doi:10.1016/j.scitotenv.2013.09.032.
31. Blair, B.; Nikolaus, A.; Hedman, C.; Klaper, R.; Grundl, T. Evaluating the degradation, sorption, and negative mass balances of pharmaceuticals and personal care products during wastewater treatment. *Chemosphere* **2015**, *134*, 395–401, doi:10.1016/j.chemosphere.2015.04.078.

32. Yuan, S.; Jiang, X.; Xia, X.; Zhang, H.; Zheng, S. Detection, occurrence and fate of 22 psychiatric pharmaceuticals in psychiatric hospital and municipal wastewater treatment plants in Beijing, China. *Chemosphere* **2013**, *90*, 2520–2525, doi:10.1016/j.chemosphere.2012.10.089.
33. Lee, H.-B.; Peart, T.E.; Lewina Svoboda, M.; Backus, S. Occurrence and fate of rosuvastatin, rosuvastatin lactone, and atorvastatin in Canadian sewage and surface water samples. *Chemosphere* **2009**, *77*, 1285–1291, doi:10.1016/j.chemosphere.2009.09.068.
